# Supplementary material for: ‘Low-value’ clinical care in general practice: associations of low value care in GP trainees’ practice, including formative and summative examination performance – protocol for cross-sectional and retrospective cohort study analyses using the QUestionable In Training Clinical Activities (QUIT-CA) index
Source: HighWire-hosted journal article supplement (doi:10.1136/bmjopen-2021-058989), 2022-05-01
Supplement: bmjopen-2021-058989supp001_data_supplement.pdf [file bmjopen-2021-058989supp001_data_supplement.pdf]

**Supplementary Table : Low-value, questionable clinical activities included in the QQuestionable In Training Clinical Activities (QUIT-CA) index\***

|                                                                                      | Recommendation                                                                                                                                                                            | Clinical outcome | Inclusions/duplications                                                            |
|--------------------------------------------------------------------------------------|-------------------------------------------------------------------------------------------------------------------------------------------------------------------------------------------|------------------|------------------------------------------------------------------------------------|
| Royal Australian College of General Practitioners                                    | Don't order chest x-rays in patients with uncomplicated acute bronchitis.                                                                                                                 | Imaging          | nil                                                                                |
| Royal Australasian College of Physicians Paediatrics & Child Health Division Council | Do not routinely order abdominal X-rays for the diagnosis of non-specific abdominal pain in children                                                                                      | Imaging          | <18yrs                                                                             |
| Royal Australasian College of Physicians Paediatrics & Child Health Division^        | Do not routinely undertake chest X-rays for the diagnosis of bronchiolitis in children [or routinely prescribe salbutamol or systemic corticosteroids to treat bronchiolitis in children] | Imaging          | <3yrs                                                                              |
| The Endocrine Society of Australia                                                   | Don't routinely order a thyroid ultrasound in patients with abnormal thyroid function tests if there is no palpable abnormality of the thyroid gland.                                     | Imaging          | nil                                                                                |
| Royal Australasian College of Physicians Paediatrics & Child Health Division Council | Do not routinely order chest X-rays for the diagnosis of asthma in children                                                                                                               | Imaging          | <18yrs                                                                             |
| Australasian Faculty of Occupational and Environmental Medicine                      | Do not request low back X-rays or other forms of low back imaging as part of a routine preplacement medical examination.                                                                  | Imaging          | nil                                                                                |
| The Australian Physiotherapy Association                                             | Don't request imaging for patients with non-specific low back pain and no indicators of a serious cause for low back pain.                                                                | Imaging          | < 50yrs<br>Some problems restricted to continuing problems<br>Five recommendations |
| The Royal Australian and New Zealand College of Radiologists                         | Don't perform imaging for patients with non-specific acute low back pain and no indicators of a serious cause for low back pain.                                                          |                  |                                                                                    |
| Australasian Faculty of Occupational and Environmental Medicine                      | Do not order X-rays or other imaging for acute non-specific low back pain, unless there are red flags or other clinical reasons to suspect serious spinal pathology.                      |                  |                                                                                    |
| Australasian Faculty of Rehabilitation Medicine                                      | Do not use imaging for diagnosing non-specific acute low back pain in the absence of red flags.                                                                                           |                  |                                                                                    |

|                                                                                                                      |                                                                                                                                                                                                                                                                                    |            |                       |
|----------------------------------------------------------------------------------------------------------------------|------------------------------------------------------------------------------------------------------------------------------------------------------------------------------------------------------------------------------------------------------------------------------------|------------|-----------------------|
| Australian Rheumatology Association                                                                                  | Do not undertake imaging for low back pain in patients without indications of a serious underlying condition.                                                                                                                                                                      |            |                       |
| The Australia and New Zealand Child Neurology Society                                                                | Do not routinely perform electroencephalographs (EEGs) for children presenting with febrile seizures.                                                                                                                                                                              | Imaging    | <18yrs                |
| The Australia and New Zealand Child Neurology Society                                                                | Do not routinely perform computed tomography (CT) scanning of children presenting with new onset seizures.                                                                                                                                                                         | Imaging    | <18yrs<br>New problem |
| The Australia and New Zealand Child Neurology Society                                                                | Do not routinely perform electroencephalographs (EEGs) for children presenting with syncope (fainting).                                                                                                                                                                            | Imaging    | <18yrs                |
| Australasian Faculty of Occupational and Environmental Medicine                                                      | Do not repeat chest X-rays when screening asbestos-exposed workers unless clinically indicated.                                                                                                                                                                                    | Imaging    | Old problem           |
| Royal Australasian College of Surgeons                                                                               | Don't order computed tomography (CT) scan of the head/brain for sudden hearing loss.                                                                                                                                                                                               | Imaging    | New problem           |
| Royal Australasian College of Surgeons                                                                               | Do not use ultrasound for the further investigation of clinically apparent groin hernias. Ultrasound should not be used as a justification for repair of hernias that are not clinically apparent.                                                                                 | Imaging    | nil                   |
| Royal Australasian College of Surgeons                                                                               | Don't routinely obtain radiographic imaging for patients who meet diagnostic criteria for uncomplicated acute rhinosinusitis.                                                                                                                                                      | Imaging    | New problem           |
| Australian and New Zealand Association of Neurologists<br><br>Internal Medicine Society of Australia and New Zealand | Don't perform imaging of the carotid arteries for simple faints.<br><br>Don't request Holter monitoring, carotid duplex scans, echocardiography, electroencephalograms (EEGs) or telemetry in patients with first presentation of uncomplicated syncope and no high risk features. | Imaging    | Two recommendations   |
| Australian and New Zealand Association of Neurologists                                                               | Don't perform imaging of the brain for non-acute primary headache disorders.                                                                                                                                                                                                       | Imaging    | Old problem           |
| The Thoracic Society of Australia and New Zealand                                                                    | Do not prescribe antibiotics for exacerbation of asthma.                                                                                                                                                                                                                           | Medication | nil                   |
| Royal Australasian College of Physicians Paediatrics & Child Health Division                                         | Do not routinely treat gastroesophageal reflux disease (GORD) in infants with acid suppression therapy.                                                                                                                                                                            | Medication | <12months             |

|                                                                               |                                                                                                                                                                                           |            |                                                                                     |
|-------------------------------------------------------------------------------|-------------------------------------------------------------------------------------------------------------------------------------------------------------------------------------------|------------|-------------------------------------------------------------------------------------|
| Royal Australasian College of Physicians Paediatrics & Child Health Division^ | Do not [routinely undertake chest X-rays for the diagnosis of bronchiolitis in children or] routinely prescribe salbutamol or systemic corticosteroids to treat bronchiolitis in children | Medication | <3yrs                                                                               |
| Royal Australasian College of Physicians Paediatrics & Child Health Division  | Do not routinely prescribe oral antibiotics to children with fever without an identified bacterial infection                                                                              | Medication | <18yrs<br>Oral medication                                                           |
| College of Intensive Care Medicine of Australia and New Zealand               | Avoid prescribing antibiotics for upper respiratory tract infection.                                                                                                                      | Medication | nil                                                                                 |
| The Thoracic Society of Australia and New Zealand                             | Do not use oral beta2 agonists as bronchodilators in asthma, wheeze or bronchiolitis.                                                                                                     | Medication | Oral medication                                                                     |
| The Society of Hospital Pharmacists of Australia                              | Don't initiate and continue antipsychotic medicines for behavioural and psychological symptoms of dementia for more than 3 months.                                                        |            | Continuing medication<br>Two recommendations                                        |
| Australian and New Zealand Society for Geriatric Medicine                     | Do not use antipsychotics as the first choice to treat behavioural and psychological symptoms of dementia.                                                                                | Medication |                                                                                     |
| Australian and New Zealand Society for Geriatric Medicine                     | Do not prescribe benzodiazepines or other sedative-hypnotics to older adults as first choice for insomnia, agitation or delirium.                                                         | Medication | ≥65yrs                                                                              |
| Australian and New Zealand Association of Neurologists                        | Don't use opioids for the treatment of migraine, except in rare circumstances.                                                                                                            | Medication | nil                                                                                 |
| Faculty of Pain Medicine, ANZCA                                               | Do not prescribe benzodiazepines for low back pain.                                                                                                                                       | Medication | nil                                                                                 |
| The Australasian College of Dermatologists                                    | Do not routinely prescribe antibiotics for inflamed epidermoid cysts (formerly called sebaceous cysts) of the skin.                                                                       | Medication | nil                                                                                 |
| Royal Australasian College of Surgeons                                        | Don't prescribe oral antibiotics for uncomplicated acute otitis externa.                                                                                                                  | Medication | New problem<br>Oral medication                                                      |
| Royal Australian College of General Practitioners                             | Don't treat otitis media (middle ear infection) with antibiotics, in non-Indigenous children aged 2-12 years, where reassessment is a reasonable option.                                  | Medication | New problem<br>Non-Indigenous<br>2-12yrs<br>Major city and Inner regional practices |
| Australasian Society of Clinical Immunology and Allergy                       | Don't use antihistamines to treat anaphylaxis – prompt administration of adrenaline (epinephrine) is the only treatment for anaphylaxis.                                                  | Medication | nil                                                                                 |

|                                                            |                                                                                                                                                                                     |            |                                           |
|------------------------------------------------------------|-------------------------------------------------------------------------------------------------------------------------------------------------------------------------------------|------------|-------------------------------------------|
| Australasian Society for Infectious Diseases^              | Do not [take a swab or] use antibiotics for the management of a leg ulcer without clinical infection.                                                                               | Medication | nil                                       |
| Faculty of Pain Medicine, ANZCA                            | Avoid prescribing pregabalin and gabapentin for pain which does not fulfil the criteria for neuropathic pain                                                                        | Medication | nil                                       |
| Australasian Society for Infectious Diseases               | Do not use antimicrobials to treat bacteriuria in older adults where specific urinary tract symptoms are not present.                                                               | Medication | >65yrs                                    |
| The Endocrine Society of Australia                         | Don't prescribe testosterone therapy unless there is evidence of proven testosterone deficiency.                                                                                    | Medication | nil                                       |
| The Royal College of Pathologists of Australasia           | Do not perform population based screening for Vitamin D deficiency.                                                                                                                 | Pathology  | nil                                       |
| Australasian Society for Infectious Diseases               | Do not investigate or treat for faecal pathogens in the absence of diarrhoea or other gastro-intestinal symptoms.                                                                   | Pathology  | nil                                       |
| Society of Obstetric Medicine of Australia and New Zealand | Do not measure erythrocyte sedimentation rate (ESR) in pregnancy                                                                                                                    | Pathology  | nil                                       |
| Society of Obstetric Medicine of Australia and New Zealand | Do not do repeat testing for proteinuria in established pre-eclampsia                                                                                                               | Pathology  | Old problem                               |
| The Royal College of Pathologists of Australasia           | Restrict the use of serum tumour marker tests to the monitoring of a cancer known to produce these markers or where there is a strong known underlying predisposition or suspicion. | Pathology  | nil                                       |
| Royal Australian College of General Practitioners          | Don't test thyroid function as population screening for asymptomatic patients.                                                                                                      | Pathology  | nil                                       |
| Australasian Society for Infectious Diseases^              | Do not take a swab [or use antibiotics for the management] of a leg ulcer without clinical infection.                                                                               | Pathology  | nil                                       |
| Australasian Society for Infectious Diseases               | In a patient with fatigue, avoid performing multiple serological investigations, without a clinical indication or relevant epidemiology.                                            | Pathology  | More than three tests for fatigue problem |
| Australian Rheumatology Association                        | Do not order antinuclear antibody (ANA) testing without symptoms and/or signs suggestive of a systemic rheumatic disease.                                                           | Pathology  | nil                                       |
| The Royal College of Pathologists of Australasia           | Do not perform surveillance urine cultures or treat bacteriuria in elderly patients in the absence of symptoms or signs of infection.                                               | Pathology  | >65yrs                                    |

|                                                |                                                                                                                                                                  |                           |     |
|------------------------------------------------|------------------------------------------------------------------------------------------------------------------------------------------------------------------|---------------------------|-----|
| Australasian Chapter of Sexual Health Medicine | Do not order herpes serology tests unless there is a clear clinical indication.                                                                                  | Pathology                 | nil |
| The Endocrine Society of Australia             | Don't order a total or free T3 level when assessing thyroxine dose in hypothyroid patients.                                                                      | Pathology                 | nil |
| The Endocrine Society of Australia             | Do not measure insulin concentration in the fasting state or during an oral glucose tolerance test to assess insulin sensitivity.                                | Pathology                 | nil |
| Gastroenterological Society of Australia       | Do not undertake faecal occult blood testing in patients who report rectal bleeding, or require investigation for iron deficiency or gastrointestinal symptoms   | Pathology                 | nil |
| Australian Rheumatology Association            | Do not use ultrasound guidance to perform injections into the subacromial space as it provides no additional benefit in comparison to landmark-guided injection. | Referral (to radiologist) | nil |

\* Derived from items in the Choosing Wisely Australia Recommendations 'Tests, treatments, and procedures for healthcare providers and consumers to question' (<https://www.choosingwisely.org.au/recommendations>)

^ These recommendations contain two distinct clinical activities relating to the same recommendation
